# Supplementary material
Source: publisher figshare collection journal article supplement (https://acs.figshare.com/ndownloader/files/12559565)
Supplement: Supplementary file 1 [file 12559565]

## **Supporting Information**

### **Biological Leaching and Chemical Precipitation Methods for Recovery of Co and Li from Spent Lithium-Ion Batteries**

Basanta Kumar Biswal<sup>1,2,3\*</sup>, Umesh U. Jadhav<sup>1,2</sup>, Munusamy Madhaiyan<sup>4</sup>, Lianghui Ji<sup>4</sup>, En-Hua Yang<sup>2</sup>, Bin Cao<sup>2,3</sup>

<sup>1</sup>Energy Research Institute @ NTU (ERI@N), Nanyang Technological University, Research Techno Plaza, 50 Nanyang Drive, Singapore 637553

<sup>2</sup>School of Civil and Environmental Engineering, Nanyang Technological University, 50 Nanyang Avenue, Singapore 637551

<sup>3</sup>Singapore Centre for Environmental Life Sciences Engineering, Nanyang Technological University, Singapore 639798

<sup>4</sup>Biomaterials and Biocatalysts Group, Temasek Life Sciences Laboratory, National University of Singapore, 1 Research Link, Singapore 117604

#### **\*Corresponding Author and Present Address**

Dr. Basanta Kumar Biswal, E-mail: [bkbiswal@ust.hk](mailto:bkbiswal@ust.hk); [pupun.biswal@gmail.com](mailto:pupun.biswal@gmail.com).

Tel: (+852) 2358-8191

Department of Civil and Environmental Engineering

The Hong Kong University of Science and Technology (HKUST), Hong Kong

Table S1: Removal efficiency of Cobalt and Lithium from spent LIB in fungal, bacterial and chemical leaching methods

| Metal   | Metal removal efficiency (%) <sup>a</sup> |        |        |                     |        |                             |        |        |                       |               |
|---------|-------------------------------------------|--------|--------|---------------------|--------|-----------------------------|--------|--------|-----------------------|---------------|
|         | <i>A. niger</i> MM1                       |        |        | <i>A. niger</i> SG1 |        | <i>A. thiooxidans</i> 80191 |        |        | Chemical <sup>b</sup> |               |
|         | Abiotic                                   | Type 1 | Type 2 | Type 1              | Type 2 | Abiotic                     | Type 1 | Type 2 | Citric acid           | Sulfuric acid |
| Cobalt  | 8±3                                       | 67±3   | 82±3   | 67±2                | 80±3   | 1±0.2                       | 3±0.1  | 23±0.1 | 67±2                  | 18±3          |
| Lithium | 25±1                                      | 81±10  | 100±2  | 86±0.4              | 100±3  | 23±0.6                      | 23±0.5 | 66±2   | 96±8                  | 59±7          |

<sup>a</sup>Metal removal efficiency was calculated by comparing with the values obtained from inorganic acid leaching: Cobalt (Co) = 159.6 mg/g spent LIB powder, and Lithium (Li) = 20.7 mg/g spent LIB powder. <sup>b</sup>Chemical: Citric acid = 102.4 mM, and Sulfuric acid = 10.2 mM.
